# Supplementary figures and images for: Advances and Physicochemical Property Investigations by Methylene Chain Length of Perovskite-type Layer Crystals [NH3(CH2)nNH3]CdCl4 (n=2, 3, and 4)
Source: Research Square preprint supplement (doi:10.21203/rs.3.rs-530081/v1), 2021-05-28

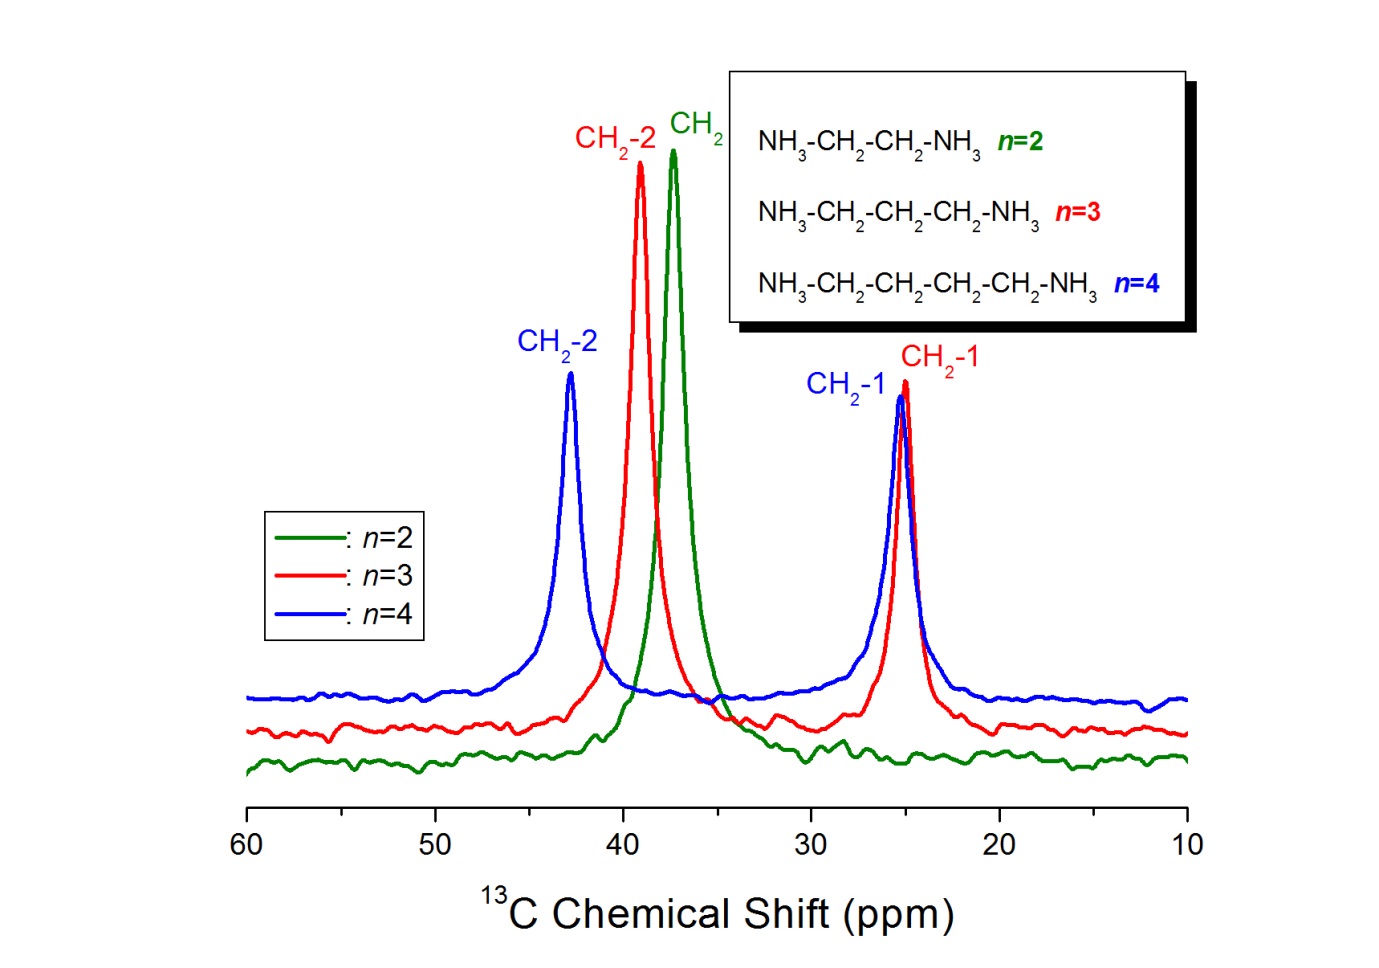


.

Supplement: Supplementary file 1 [file c021058b78ed626364dce4c0.docx]
